# Supplementary material for: Integrating Functional Data to Prioritize Causal Variants in Statistical Fine-Mapping Studies
Source: PubMed Central journal article supplement (PMC4214605; doi:10.1371/journal.pgen.1004722), 2014-10-30
Supplement: pgen.1004722.s011.pdf [file pgen.1004722.s011.pdf]

| Method        | Operate on<br>Summary Data | Integrates<br>Functional Priors | Can Handle<br>Multiple Causal<br>Variants |
|---------------|----------------------------|---------------------------------|-------------------------------------------|
| PAINTOR       | Yes                        | Yes                             | Yes                                       |
| Maller et al. | Yes                        | No                              | No                                        |
| fgwas         | Yes                        | Yes                             | No                                        |
| piMass        | No                         | No                              | Yes                                       |
| LLARRMA       | No                         | No                              | Yes                                       |
| CAT score     | No                         | No                              | Yes                                       |
