# Supplementary material for: Integrating Functional Data to Prioritize Causal Variants in Statistical Fine-Mapping Studies
Source: PubMed Central journal article supplement (PMC4214605; doi:10.1371/journal.pgen.1004722), 2014-10-30
Supplement: pgen.1004722.s012.pdf [file pgen.1004722.s012.pdf]

| Significance Quartile | Fraction of Causals | PAINTOR | PAINTOR No Annot | Percent Change |
|-----------------------|---------------------|---------|------------------|----------------|
| Bottom 25%            | 0.50                | 17.98   | 26.37            | 31.79%         |
|                       | 0.90                | 130.32  | 165.83           | 21.41%         |
| Top 25%               | 0.50                | 34.62   | 50.28            | 31.13%         |
|                       | 0.90                | 236.31  | 252.64           | 6.46%          |
