# Supplementary material for: Integrating Functional Data to Prioritize Causal Variants in Statistical Fine-Mapping Studies
Source: PubMed Central journal article supplement (PMC4214605; doi:10.1371/journal.pgen.1004722), 2014-10-30
Supplement: pgen.1004722.s013.pdf [file pgen.1004722.s013.pdf]

| Threshold on<br>Posterior | PAINTOR    |         |           | PAINTOR No Annotation |         |           |
|---------------------------|------------|---------|-----------|-----------------------|---------|-----------|
|                           | Total SNPs | Causals | Objective | TotalSNPs             | Causals | Objective |
| 0.10                      | 232.85     | 78.61   | 1.00      | 265.16                | 73.79   | 1.00      |
| 0.20                      | 132.59     | 65.52   | 0.93      | 128.20                | 56.09   | 0.90      |
| 0.30                      | 93.51      | 57.09   | 0.84      | 80.28                 | 45.68   | 0.77      |
| 0.40                      | 72.61      | 50.84   | 0.76      | 57.92                 | 39.20   | 0.68      |
| 0.50                      | 57.96      | 45.00   | 0.68      | 43.03                 | 33.23   | 0.59      |
| 0.60                      | 48.78      | 40.54   | 0.62      | 35.88                 | 30.06   | 0.53      |
| 0.70                      | 41.33      | 36.30   | 0.56      | 31.23                 | 27.59   | 0.48      |
| 0.80                      | 34.20      | 31.60   | 0.48      | 27.16                 | 25.17   | 0.44      |
| 0.90                      | 27.56      | 26.51   | 0.40      | 22.95                 | 22.07   | 0.38      |
