# Supplementary material for: Integrating Functional Data to Prioritize Causal Variants in Statistical Fine-Mapping Studies
Source: PubMed Central journal article supplement (PMC4214605; doi:10.1371/journal.pgen.1004722), 2014-10-30
Supplement: pgen.1004722.s014.pdf [file pgen.1004722.s014.pdf]

| Percentile     | HapMap | 1000 Genomes |
|----------------|--------|--------------|
| $\leq 10^{th}$ | -8.73  | -9.49        |
| $\geq 90^{th}$ | 1.90   | 1.97         |
