# Supplementary material for: Integrating Functional Data to Prioritize Causal Variants in Statistical Fine-Mapping Studies
Source: PubMed Central journal article supplement (PMC4214605; doi:10.1371/journal.pgen.1004722), 2014-10-30
Supplement: pgen.1004722.s015.pdf [file pgen.1004722.s015.pdf]

| rsID       | Chrom | Pos       | -Log10(P.value) | PAINTOR<br>Probability | Annotations                                           |
|------------|-------|-----------|-----------------|------------------------|-------------------------------------------------------|
| rs41290120 | chr19 | 45382675  | 181.02          | 1.00                   | fKidney DHS, fLung DHS, Hepatocytes DHS,<br>HAsp DHS  |
| rs4420638  | chr19 | 45422946  | 146.36          | 1.00                   | Hepatocytes DHS                                       |
| rs5930     | chr19 | 11224265  | 32.88           | 1.00                   | fKidney DHS, Coding Exons                             |
| rs4953023  | chr2  | 44074000  | 32.78           | 1.00                   | fKidney DHS, fLung DHS, Hepatocytes DHS               |
| rs6511720  | chr19 | 11202306  | 116.67          | 1.00                   | fKidney DHS , fLung DHS, Hepatocytes DHS,<br>HAsp DHS |
| rs7746081  | chr6  | 16126934  | 13.26           | 0.98                   | fKidney DHS, fLung DHS, Hepatocytes DHS,<br>HAsp DHS  |
| rs629301   | chr1  | 109818306 | 170.32          | 0.94                   | fKidney DHS ,fLung DHS, Hepatocytes DHS,<br>HAsp DHS  |
| rs1564348  | chr6  | 160578860 | 17.07           | 0.93                   | fLung DHS ,HAsp DHS                                   |
