# Supplementary material for: Integrating Functional Data to Prioritize Causal Variants in Statistical Fine-Mapping Studies
Source: PubMed Central journal article supplement (PMC4214605; doi:10.1371/journal.pgen.1004722), 2014-10-30
Supplement: pgen.1004722.s016.pdf [file pgen.1004722.s016.pdf]

| rsID       | Chrom | Pos       | -Log10(P.value) | PAINTOR<br>Probability | Annotations                                                    |
|------------|-------|-----------|-----------------|------------------------|----------------------------------------------------------------|
| rs34006994 | chr1  | 25780668  | 9.51            | 1.00                   | hepg2 Transcribed                                              |
| rs2000999  | chr16 | 72108093  | 23.79           | 1.00                   | fLung DHS, fIntestine(Lg) DHS, hepg2 Transcribed, NHDF_neo DHS |
| rs12916    | chr5  | 74656539  | 46.35           | 0.97                   | fLung DHS, hepg2 Transcribed                                   |
| rs6882076  | chr5  | 156390297 | 27.43           | 0.95                   | hepg2 Repressed                                                |
| rs7570971  | chr2  | 135837906 | 8.02            | 0.95                   | hepg2 Transcribed                                              |
