# Supplementary material for: Integrating Functional Data to Prioritize Causal Variants in Statistical Fine-Mapping Studies
Source: PubMed Central journal article supplement (PMC4214605; doi:10.1371/journal.pgen.1004722), 2014-10-30
Supplement: pgen.1004722.s017.pdf [file pgen.1004722.s017.pdf]

| rsID        | Chrom | Pos       | -Log10(P.value) | PAINTOR<br>Probability | Annotations                                                    |
|-------------|-------|-----------|-----------------|------------------------|----------------------------------------------------------------|
| rs1260326 * | chr2  | 27730940  | 132.55          | 1.00                   | Coding Exons ,Non-coding Exons                                 |
| rs138022915 | chr8  | 19885934  | 98.98           | 1.00                   | hepg2 Repressed                                                |
| rs138570705 | chr15 | 44266730  | -28.19          | 1.00                   | hepg2 Repressed , GM19238 DHS                                  |
| rs4665985   | chr2  | 27753878  | 52.44           | 1.00                   | hepg2 Repressed                                                |
| rs5110*     | chr11 | 116691634 | 34.09           | 1.00                   | Coding Exons , hepg2 Repressed, GM19238<br>DHS ,fIntestine(Sm) |
| rs964184    | chr11 | 116648917 | 227.68          | 1.00                   | fIntestine(Sm)                                                 |
| rs114366307 | chr8  | 19885726  | 98.98           | 1.00                   | hepg2 Repressed                                                |
| rs11743303  | chr5  | 55859952  | 9.13            | 1.00                   | hepg2 Repressed , GM19238 DHS, fIntes-<br>tine(Sm)             |
| rs2412710   | chr15 | 42683787  | 8.03            | 0.99                   | GM19238 DHS , fIntestine(Sm)                                   |
