# Supplementary material for: Integrating Functional Data to Prioritize Causal Variants in Statistical Fine-Mapping Studies
Source: PubMed Central journal article supplement (PMC4214605; doi:10.1371/journal.pgen.1004722), 2014-10-30
Supplement: pgen.1004722.s018.pdf [file pgen.1004722.s018.pdf]

| % Causal | N=1000 | N=2500 | N=5000 | N=10000 |
|----------|--------|--------|--------|---------|
| 10%      | 0.66   | 0.25   | 0.17   | 0.16    |
| 50%      | 8.0    | 4.2    | 2.28   | 1.6     |
| 90%      | 25.9   | 19.0   | 12.5   | 10.8    |
