# Supplementary material for: Integrating Functional Data to Prioritize Causal Variants in Statistical Fine-Mapping Studies
Source: PubMed Central journal article supplement (PMC4214605; doi:10.1371/journal.pgen.1004722), 2014-10-30
Supplement: pgen.1004722.s019.pdf [file pgen.1004722.s019.pdf]

|              | HDL    | LDL    | TC     | TG     |
|--------------|--------|--------|--------|--------|
| 1KG SNPS     | 766.81 | 736.71 | 677.75 | 694.57 |
| Well-imputed | 292.30 | 279.79 | 230.33 | 240.70 |
